# Supplementary material for: Content of Phenolic Acids in the Grain of Selected Polish Triticale Cultivars and Its Products
Source: MDPI journal article supplement (doi:10.3390/molecules26030562), 2021-01-21
Supplement: s1 [file s1]

## 1. 3-OH and 4-OH benzoic acids

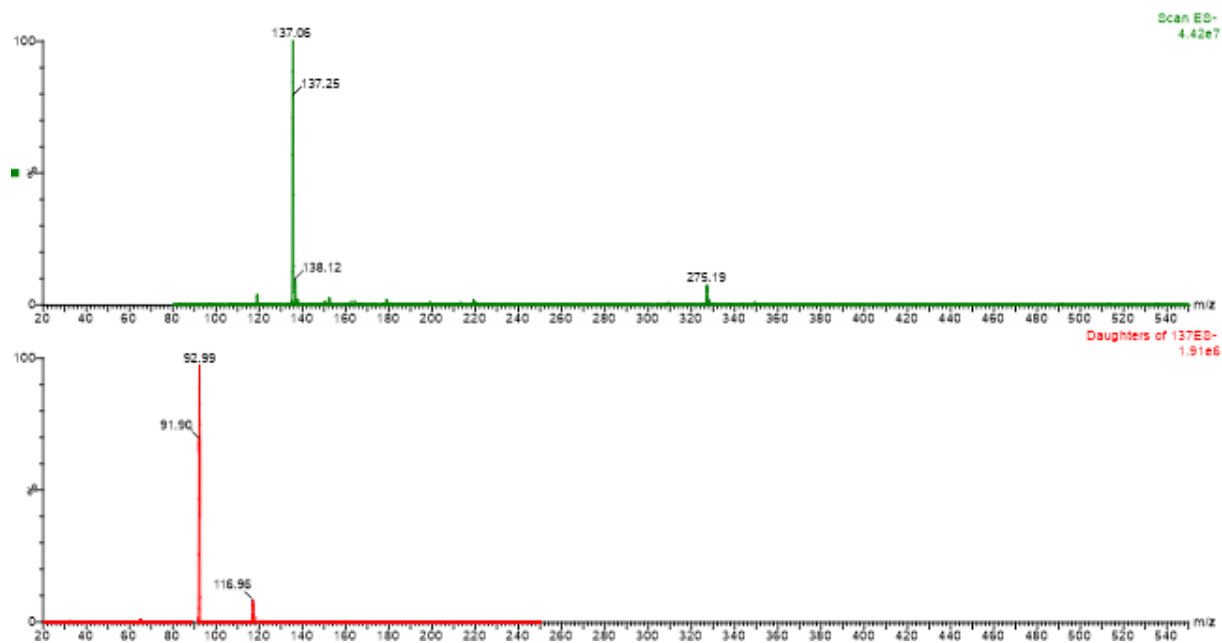

## 2. Caffeic acid

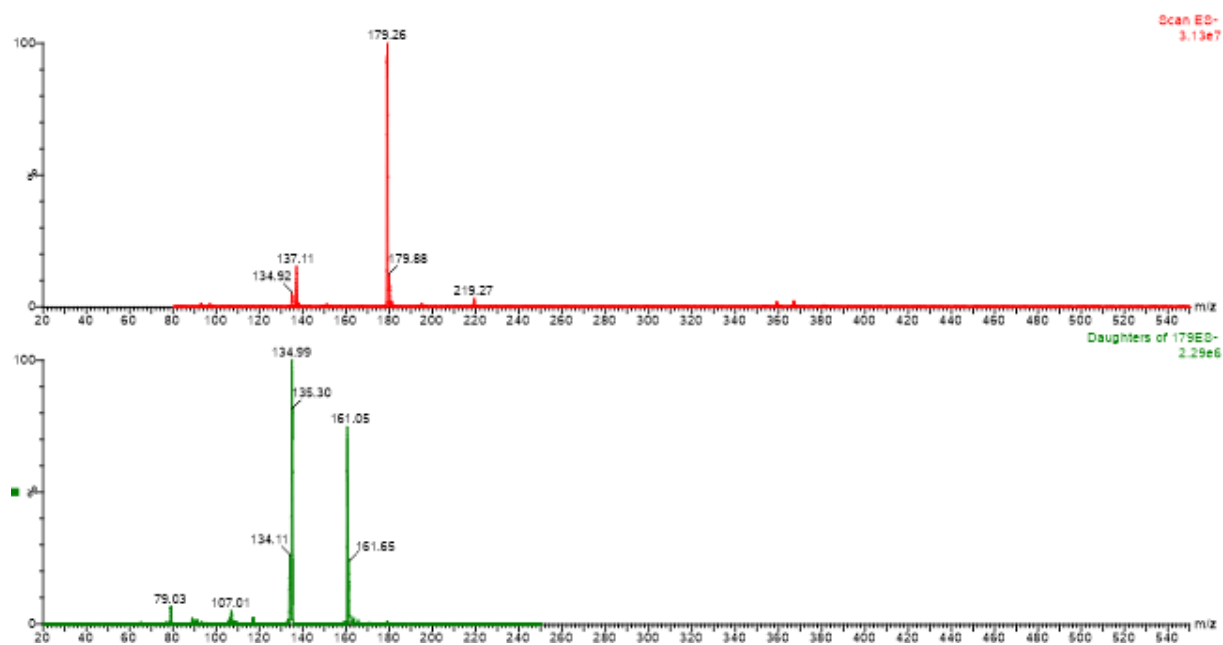

## 3. Syringic acid

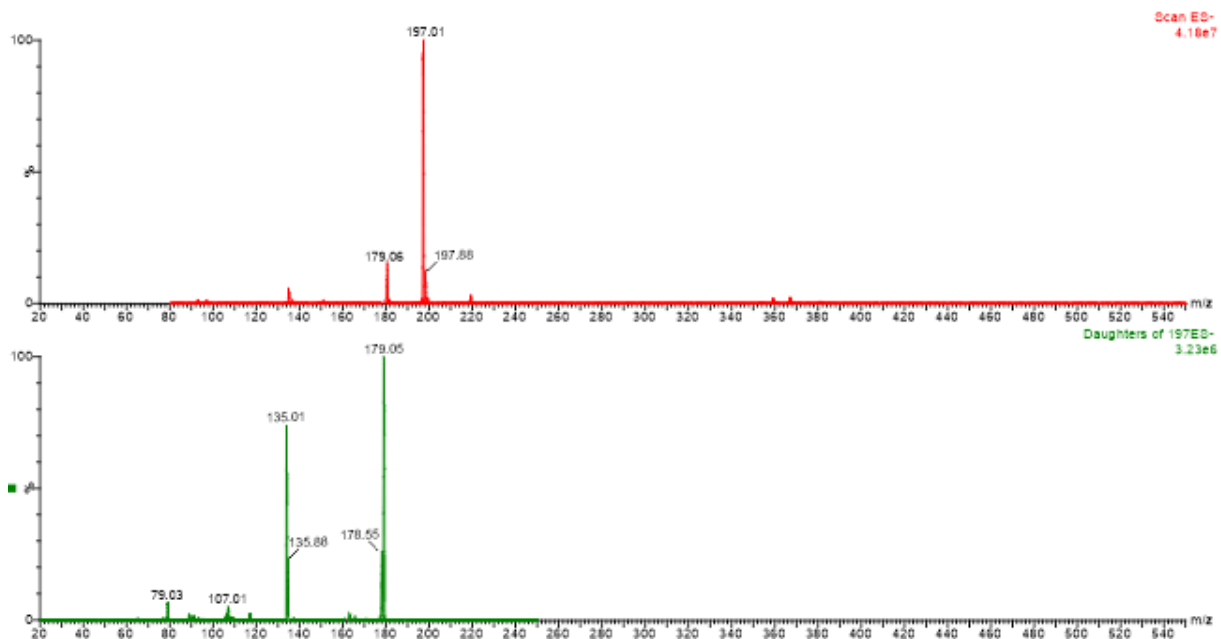

#### 4. *p*-coumaric and *o*-coumaric acids

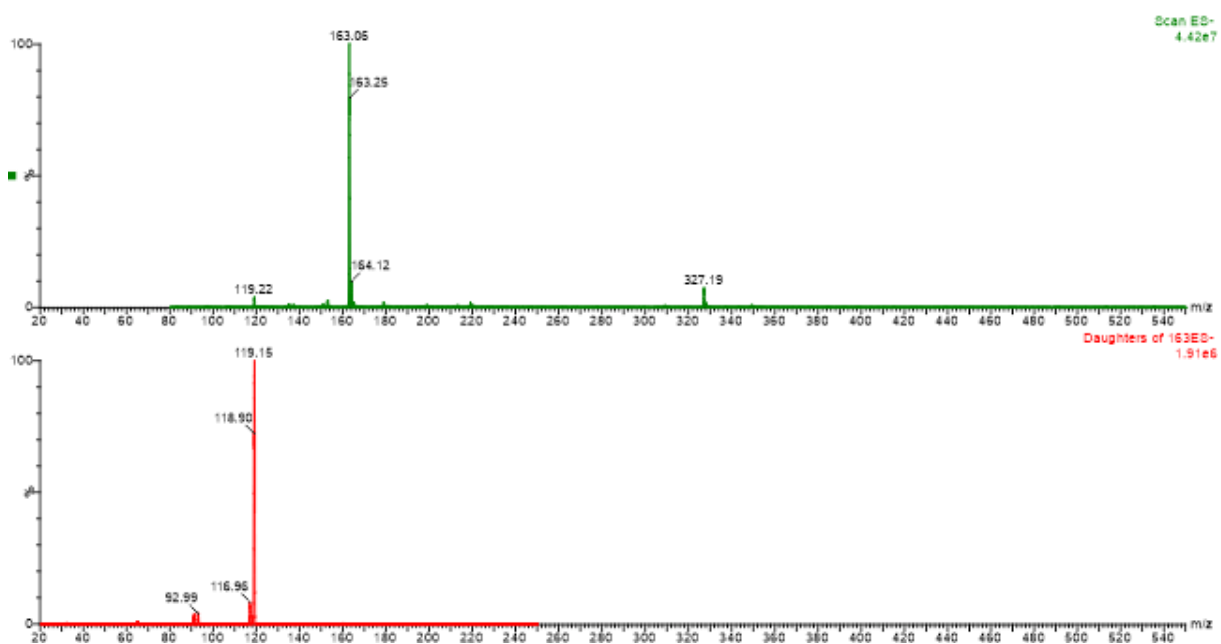

#### 5. Ferulic acid

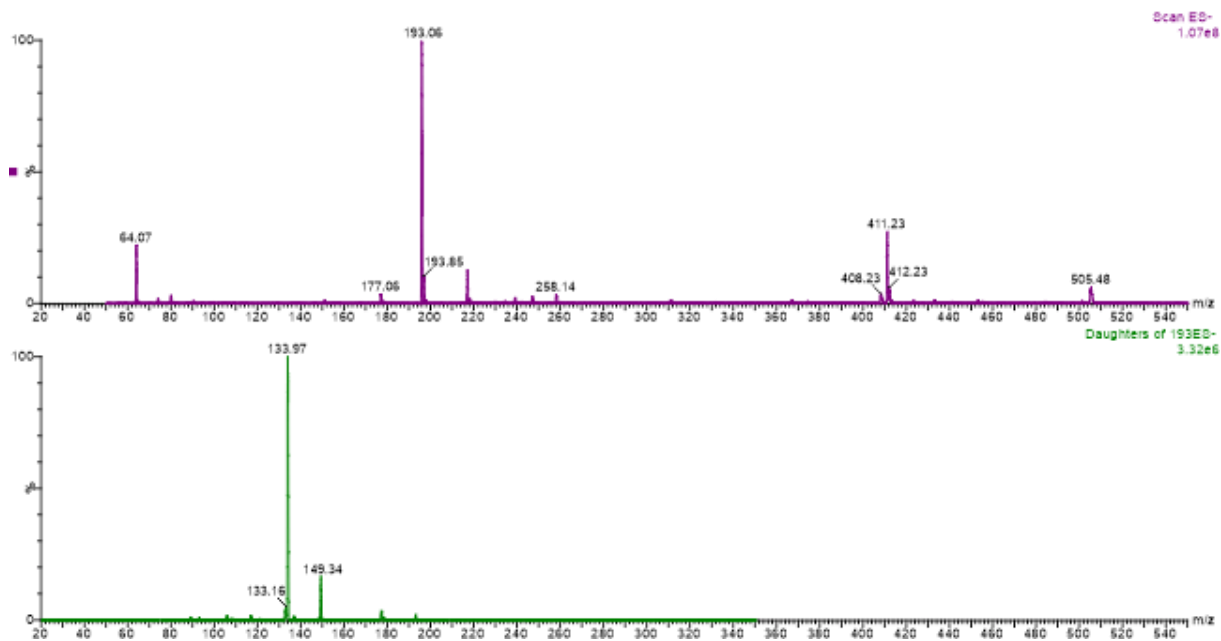

## 6. Sinapic acid

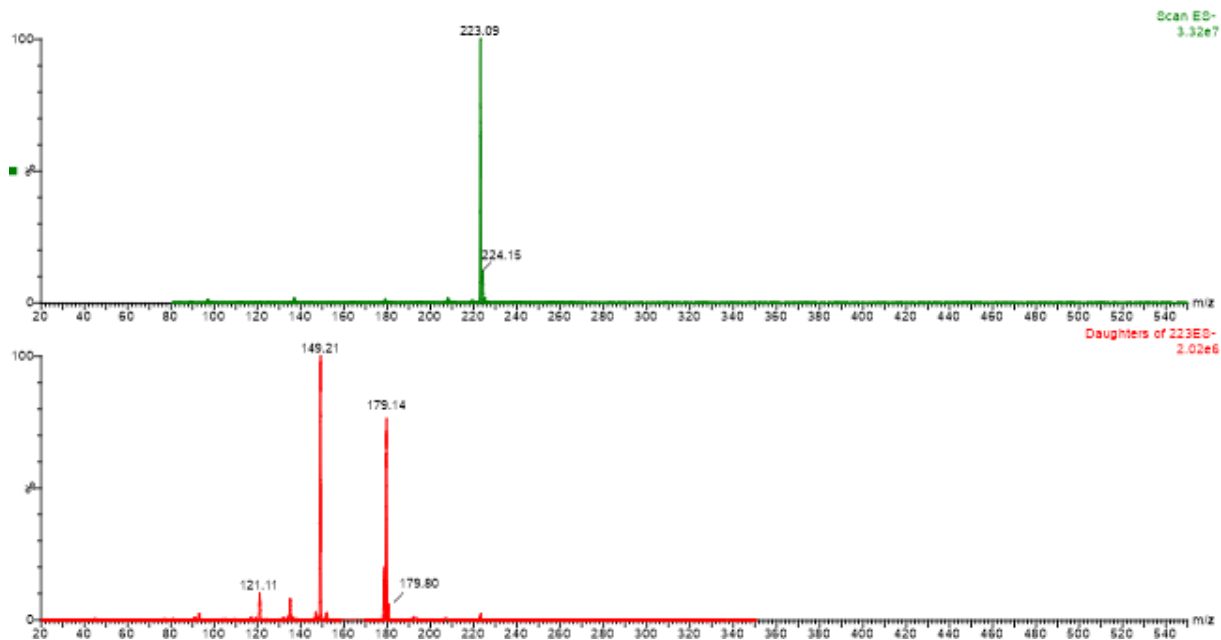

## 7. Di-ferulic acids

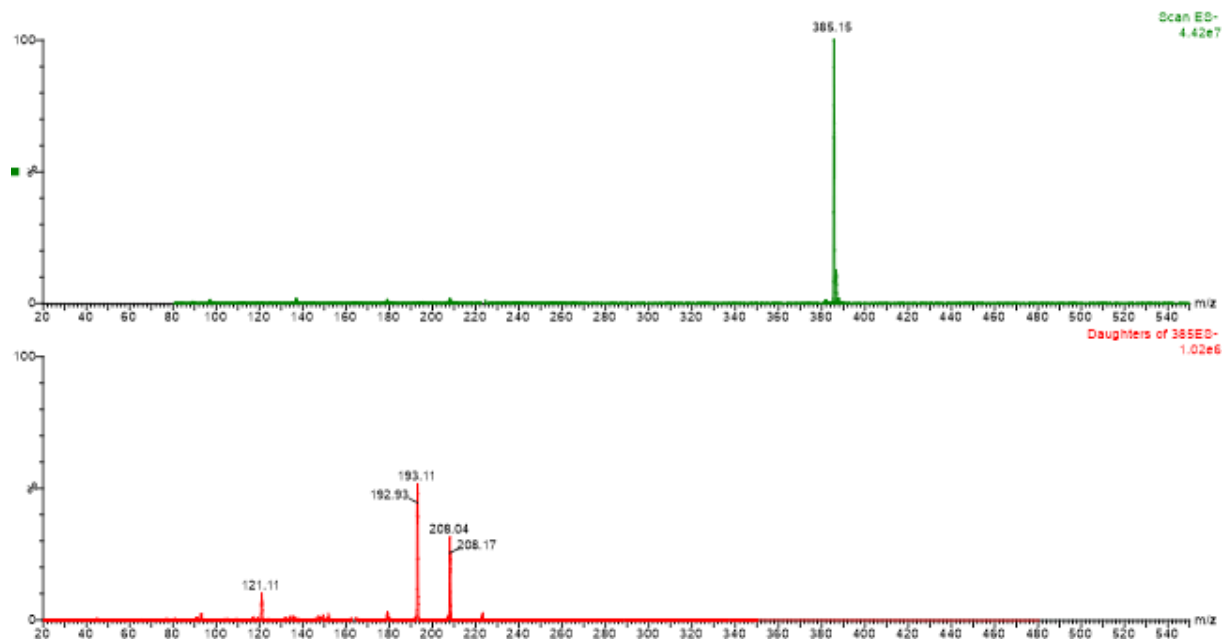

**Figure 1.** LC-MS/MS spectra of identified phenolic acids in triticale grain and its products.  
Upper – pseudomolecular ion  
Lower – daughter ions after MS/MS
